# Supplementary material for: Effect of prognostic nutritional index on laboratory parameters and survival in metastatic colorectal cancer patients treated with fruquintinib: a retrospective study
Source: PeerJ. 2024 Nov 29;12:e18565. doi: 10.7717/peerj.18565 (PMC11610478; doi:10.7717/peerj.18565)
Supplement: Supplemental Information 1 [file peerj-12-18565-s001.xlsx]

## Sheet: Table 1-3 patient information
Name	Gender	Male=0 Female=1	Age	≥65=0 ＜65=1	KRAS Mutation=1 Wild-type=0	NRAS Mutation=1 Wild-type=0	BRAF Mutation=1 Wild-type=0	Primary Site	Colon=1 Rectum=0	Left Half=1 Right Half=2	Metastatic Sites (Three or More=3)	Line of Therapy for This Drug	Third Line=1 Fourth Line and Above=2	PD-1 Combination=1 Non-Combination=0	Response	Before Fruquintinib Treatment	Blood Routine Indicators	White Blood Cells (3.5-9.5*10^9/L)	Neutrophil Count (1.8-6.3*10^9/L)	Lymphocyte Count (1.1-3.2*10^9/L)	Monocyte Count (0.1-0.6*10^9/L)	Eosinophil Count (0.02-0.52*10^9/L)	Basophil Count (0.0-0.06*10^9/L)	Red Blood Cell Count (4.3-5.8*10^12/L)	Hemoglobin (130-175 g/L)	Platelet Count (125-350*10^9/L)	Biochemical Indicators	Total Protein (40-55 g/L)	Albumin (130-175 g/L)	Aspartate Aminotransferase (15-40 U/L)	L-r-Glutamyltransferase (10-60 U/L)	Creatine Kinase (10-190 U/L)	Total Bilirubin (0-20 umol/L)	Direct Bilirubin (0-7 umol/L)	Indirect Bilirubin (0-13 umol/L)	Total Bile Acid (0-10 umol/L)	Nutrition Score	After Fruquintinib Treatment	Blood Routine Indicators	White Blood Cells (3.5-9.5*10^9/L)	Neutrophil Count (1.8-6.3*10^9/L)	Lymphocyte Count (1.1-3.2*10^9/L)	Monocyte Count (0.1-0.6*10^9/L)	Eosinophil Count (0.02-0.52*10^9/L)	Basophil Count (0.0-0.06*10^9/L)	Red Blood Cell Count (4.3-5.8*10^12/L)	Hemoglobin (130-175 g/L)	Platelet Count (125-350*10^9/L)	Biochemical Indicators
Patient 1	Male	0	78	0	1	0	0	Rectum	0	1	3	3	1	1	SD			9.6	7.5	1.4	0.2	0.5	0.03	3.93	119	117		71	39	36	106	63	13.6	4.7	8.9	1.4	2			12.2	9.4	2.1	0.6	0.1	0.07	3.67	109	261
Patient 2	Male	0	77	0	0	0	0	Rectum	0	1	1	4	2	0	SD			3.2	1.7	0.9	0.3	0.2	0.01	3.69	110	129		64.1	38.1	59	186	67	16.7	6.4	10.3	31.3	4			3.9	2.2	1.1	0.4	0.3	0.02	3.55	112	130
Patient 3	Male	0	76	0	0	0	0	Colon	1	1	3	3	1	0	SD			5.7	4.2	0.6	0.2	0.7	0.03	3.38	100	162		51.4	27.8	43	34	91	12.4	5.7	6.7	2.4	2			7.9	5.9	1.3	0.5	0.1	0.02	4.68	135	311
Patient 4	Male	0	74	0	0	0	0	Rectum	0	1	3	3	1	0	SD			3.9	2.2	1.3	0.4	0	0.03	3.47	100	308		64.8	36.9	21	23	60	11.2	3.5	7.7	3.6	4			4.3	2.3	1.7	0.2	0.1	0.02	4.24	116	151
Patient 5	Female	1	73	0	0	0	0	Colon	1	2	3	3	1	0	PD			4.4	3.1	0.8	0.3	0.1	0.02	4.05	120	243		67.8	40.1	16	23	58	8.1	2	6.1	2.5	2			4.4	3.1	0.8	0.3	0.1	0.02	4.05	120	243
Patient 6	Male	0	73	0	1	0	0	Colon	1	2	2	4	2	0	PD			7.9	4.2	1.3	1	1.3	0.06	3.63	89	242		66.9	32.1	22	74	80	4.2	0.9	3.3	10	2			10.5	6.4	2.8	1.1	0.2	0.05	3.81	90	294
Patient 7	Male	0	73	0	0	0	0	Rectum	0	1	2	3	1	1	PD			5.4	3.1	1.5	0.5	0.3	0.03	3.68	114	266		68.7	34.5	17	60	31	4.5	1.2	3.3	3.9	2			4.5	3.1	1	0.2	0.2	0.02	3.65	114	124
Patient 8	Male	0	72	0	0	0	0	Rectum	0	1	2	3	1	1	SD			9.7	7.1	1.9	0.4	0.3	0.04	4.17	107	276		68.6	32.4	13	74	21	10.1	3.3	6.8	6.9	2			10.3	7.5	1.9	0.5	0.3	0.07	5.14	132	306
Patient 9	Male	0	72	0	0	0	0	Colon	1	2	3	3	1	0	SD			3.1	1.6	1.2	0.2	0.1	0.02	4.06	135	155		67.8	41.1	27	34	101	10.3	3	7.3	3	2			2.8	1.7	0.9	0.2	0	0.01	2.94	98	230
Patient 10	Male	0	72	0	1	0	0	Rectum	0	1	2	3	1	0	PD			5.2	3.6	0.9	0.5	0.1	0.03	4.61	151	79		63.8	39.1	53	145	128	12.9	3.8	9.1	55.2	2			4.3	3.1	0.7	0.4	0	0	4.6	152	65
Patient 11	Male	0	71	0	0	0	0	Colon	1	2	2	3	1	1	SD			3.3	1.7	1.1	0.4	0	0.01	3.82	112	116		73.8	37.9	49	109	89	7.3	2.4	4.9	19.2	2			4.5	3	1	0.4	0	0.01	3.02	78	142
Patient 12	Male	0	71	0	0	0	0	Rectum	0	1	3	3	1	1	SD			7.9	6.4	0.7	0.5	0.2	0.04	3.18	86	177		71.5	41.1	11	38	75	9.8	3.9	5.9	4	2			7.8	5.6	1.3	0.5	0.3	0.04	4.01	115	162
Patient 13	Male	0	70	0	0	0	0	Rectum	0	1	2	3	1	0	SD			2.9	1.5	0.9	0.5	0.1	0.01	3.39	93	128		67.7	36.9	17	55	45	7.3	3	4.3	5.1	2			4.3	3.2	0.7	0.3	0.1	0.01	4.74	134	61
Patient 14	Male	0	70	0	0	0	0	Colon	1	1	3	3	1	0	SD			5.3	4	0.7	0.5	0.1	0.03	3.99	136	60		67.7	34.6	24	51	66	26.1	7.9	18.2	11.7	2			6.4	5.2	0.7	0.4	0.1	0.03	4.25	130	118
Patient 15	Male	0	70	0	1	0	0	Rectum	0	1	2	3	1	0	PD			4.5	2.5	1.4	0.4	0.1	0.04	3.97	123	167		65.6	41.3	36	93	88	7.4	2.8	4.6	4.7	4			9.2	6.4	2	0.6	0.2	0.04	4.22	128	156
Patient 16	Male	0	69	0	0	0	0	Rectum	0	1	1	4	2	1	SD			6.1	4.5	0.9	0.5	0.1	0.01	3.75	118	99		54	26.3	125	55	147	33.8	11.7	22.1	1.5	4			4	2.2	1.4	0.2	0.2	0.01	4.55	144	124
Patient 17	Male	0	67	0	1	0	0	Colon	1	1	2	3	1	0	SD			6.3	4.7	0.9	0.4	0.3	0.03	4.1	119	345		66.6	35.4	30	170	116	5.6	2.2	3.4	2.1	1			8.6	6.7	1.1	0.5	0.3	0.03	4.31	12.8	165
Patient 18	Female	1	67	0	1	0	0	Colon	1	2	3	4	2	0	SD			4.2	2.7	1.1	0.3	0	0.01	4.39	125	119		63.5	37.8	24	84	43	11.9	3.5	8.4	4.2	1			5.4	3.9	1.1	0.3	0.1	0.03	4.09	121	232
Patient 19	Male	0	67	0	0	0	0	Rectum	0	1	2	3	1	0	SD			5.6	4	1.2	0.3	0.1	0.02	3.74	123	197		77.7	44.1	15	19	153	7.1	1.4	5.7	5.6	1			5.3	3.5	1.5	0.2	0.1	0.02	4.22	130	168
Patient 20	Female	1	67	0	0	0	0	Rectum	0	1	2	3	1	1	SD			10.8	7.8	2.1	0.7	0.1	0.02	3.86	106	344		52.9	26.5	19	40	44	5.5	1.8	3.7	6	3			10.2	8.1	1.4	0.6	0.1	0.01	4.97	143	204
Patient 21	Male	0	66	0	0	0	0	Rectum	0	1	2	3	1	0	SD			3.8	1.6	1.8	0.4	0	0.02	3.77	121	195		72.4	43.6	26	164	62	26	8	18	2.3	2			4	2.1	1.5	0.3	0.1	0.02	4.05	127	151
Patient 22	Female	1	66	0	0	0	0	Rectum	0	1	3	3	1	1	SD			5.8	3.1	2.3	0.4	0	0.01	3.5	126	164		77.5	44.5	22	21	48	20.1	5.6	14.5	4.8	1			6.2	3.2	2.5	0.4	0.1	0.04	3.15	106	268
Patient 23	Male	0	66	0	1	0	0	Colon	1	2	2	3	1	0	PD			12.5	8.5	2.9	1	0	0.03	3.16	85	222		67.4	34.8	35	146	180	17.7	11	6.7	12.6	1			5.8	4.8	0.7	0.3	0	0.02	3.35	94	94
Patient 24	Female	1	65	0	1	0	0	Rectum	0	1	3	3	1	0	SD			7.3	5.7	1.1	0.4	0.1	0.04	4.04	124	198		66	39.7	30	48	131	16	3.5	12.5	6.4	1			6.6	4.9	1.3	0.3	0.1	0.03	4.13	123	161
Patient 25	Male	0	65	0	0	0	0	Rectum	0	1	3	3	1	0	SD			4.1	3	0.8	0.2	0	0.02	4	121	177		68	37.6	31	20	165	5.3	1.8	3.5	1.9	1			4.9	3.4	1.2	0.3	0	0.01	4.85	148	203
Patient 26	Female	1	65	0	0	0	0	Colon	1	2	3	3	1	0	PD			2.8	1.5	0.9	0.2	0.1	0.02	3.79	114	259		67.4	38.3	45	77	88	11.7	3.3	8.4	18.1	1			2.8	1.5	0.9	0.2	0.1	0.02	3.79	114	259
Patient 27	Male	0	65	0	0	0	0	Rectum	0	1	2	3	1	0	PD			6.6	5	0.8	0.8	0	0.01	3.34	97	211		72.4	33.7	51	93	236	7.4	3.1	4.3	6.4	1			8.8	7.5	0.7	0.5	0	0.04	2.9	82	150
Patient 28	Female	1	65	0	1	0	0	Colon	1	1	3	3	1	0	PD			6.7	5	1.1	0.6	0	0.03	3.63	122	342		69.7	46.2	19	76	44	8.6	2.2	6.4	12.6	2			5.5	3.4	1.5	0.5	0.1	0.01	3.94	129	322
Patient 29	Male	0	64	1	0	0	0	Colon	1	2	3	4	2	0	SD			4.7	3.1	1.1	0.3	0.2	0.03	3.96	125	118		63.8	36.4	67	164	110	7.2	2	5.2	8.9	1			6.2	4.5	1.2	0.3	0.1	0.02	4.3	131	135
Patient 30	Male	0	64	1	0	0	0	Rectum	0	1	2	3	1	0	SD			5.6	3.9	1	0.4	0.4	0.03	4.65	138	168		69.9	43.2	18	105	82	14.8	4.6	10.2	5.3	1			4.8	3.2	1	0.3	0.3	0.03	4.32	133	225
Patient 31	Male	0	64	1	0	0	0	Rectum	0	1	2	3	1	1	SD			8	5.2	2	0.6	0.1	0.03	4.78	139	214		75.2	40.6	42	82	87	14.9	4.1	10.8	9.5	1			13	8.7	3.1	0.8	0.2	0.05	4.77	140	314
Patient 32	Female	1	64	1	0	0	0	Colon	1	1	2	2		0	PD			7.9	6.1	1.2	0.6	0.1	0.02	3.7	119	114		67.7	38.5	201	47	45	17.1	4.6	12.5	4.3	1			6.1	4.1	1.6	0.3	0	0.01	3.84	123	156
Patient 33	Female	1	63	1	0	0	0	Colon	1	2	2	3	1	0	PD			4.6	1.8	2.3	0.4	0.1	0.01	4.3	144	206		72.4	41.8	19	43	28	9.5	2.8	6.7	2.3	1			9.4	5.4	3.2	0.7	0.1	0.03	4.54	142	296
Patient 34	Female	1	62	1	1	0	0	Rectum	0	1	2	3	1	1	SD			5.1	3.9	0.6	0.3	0.3	0.03	3.57	111	251		65.2	41.7	56	357	45	9.8	3.3	6.5	5.5	1			4.3	3.3	0.5	0.3	0.1	0.03	4.21	129	186
Patient 35	Female	1	62	1	0	0	0	Colon	1	1	2	4	2	1	PD			3.3	2.6	0.4	0.3	0.1	0.01	3.36	103	64		68.1	40.1	36	156	45	14.1	4.6	9.5	8.9	2			3.6	2.6	0.6	0.2	0.2	0.01	3.83	107	100
Patient 36	Female	1	62	1	0	0	0	Colon	1	2	2	3	1	1	SD			2.8	2	0.5	0.3	0	0.02	2.95	95	147		64.3	32.5	42	87	60	8.8	4.7	4.1	2.2	4			3.8	3	0.4	0.4	0	0.01	2.03	65	113
Patient 37	Male	0	60	1	0	0	0	Rectum	0	1	2	5	2	0	PD			5.8	4.5	0.7	0.3	0.3	0.01	4.81	131	147		64.3	40.1	31	167	125	9.3	3.7	5.6	7	1			4.2	3.4	0.5	0.2	0.1	0.01	4.49	130	187
Patient 38	Male	0	60	1	0	0	1	Colon	1	2	3	3	1	0	PD			4.7	3.6	0.4	0.7	0.1	0.01	3.35	99	191		62.8	40.1	24	70	147	7.7	2.1	5.6	3.1	3			4.7	3.6	0.4	0.7	0.1	0.01	3.35	99	191
Patient 39	Male	0	60	1	0	0	0	Colon	1	1	2	3	1	0	SD			4.6	2.7	1	0.4	0.5	0.01	4.18	132	159		58.2	34.9	33	4	65	7.7	2	5.7	5.1	1			7.9	4.2	2.1	0.6	1	0.01	4.25	134	255
Patient 40	Male	0	60	1	0	0	0	Rectum	0	1	3	3	1	1	SD			4.8	2.9	1.3	0.4	0.2	0.04	4.06	133	152		66.5	41.3	56	44	275	17	4.5	12.5	17.9	1			4.1	2.6	0.9	0.4	0.2	0.04	4.67	136	176
Patient 41	Female	1	60	1	1	0	0	Colon	1	2	3	4	2	1	SD			6.2	3.7	1.9	0.3	0.2	0.04	3.59	118	255		70.1	39.3	41	65	66	9.1	2.6	6.5	3	2			6.2	3.7	1.9	0.3	0.2	0.04	3.59	118	255
Patient 42	Male	0	60	1	0	0	0	Colon	1	1	2	4	2	1	SD			6.6	4.1	1.8	0.3	0.4	0.03	4.09	120	187		67.7	39.5	14	23	65	7	2.2	4.8	1.1	1			6.3	3.4	2.1	0.3	0.4	0.04	4.21	118	255
Patient 43	Male	0	59	1	0	0	0	Colon	1	1	2	3	1	1	PR			6.4	5.3	0.7	0.3	0.1	0.02	4.26	125	250		73.3	40.4	24	18	408	6.1	1.4	4.7	4.3	1			4.8	3.8	0.7	0.2	0	0.01	4.37	132	210
Patient 44	Male	0	59	1	0	1	0	Rectum	0	1	2	3	1	0	SD			4	2.5	1.1	0.3	0.1	0.01	3.7	12.9	113		70.6	41.5	22	69	81	12.8	4.1	8.7	13.9	1			3.7	2.5	0.8	0.3	0	0.01	4.06	125	63
Patient 45	Male	0	59	1	0	0	0	Rectum	0	1	3	5	2	1	SD			5.7	4.6	0.4	0.6	0.1	0.03	4.14	137	134		62.5	40.7	32	113	209	12.2	4.6	7.6	16.8	2			4.2	3.2	0.4	0.5	0.1	0.02	4.1	125	153
Patient 46	Male	0	59	1	1	0	0	Rectum	0	1	3	3	1	1	SD			4.2	3	0.8	0.3	0.1	0.01	4.36	125	162		65.2	42.8	13	33	46	32.5	8.8	23.7	71.5	1			6	4.5	0.9	0.5	0.1	0.02	4.74	129	156
Patient 47	Male	0	59	1	0	0	0	Colon	1	1	3	3	1	1	SD			6.2	4.5	1.1	0.5	0.1	0.02	4.28	130	145		71.5	40.9	29	41	82	10.9	3.5	7.4	2.8	1			7.3	3.8	1.6	0.4	1.5	0.05	4.61	139	176
Patient 48	Male	0	58	1	1	1	0	Rectum	0	1	3	3	1	0	PD			9.2	6.3	1.3	0.7	0.8	0.05	3.72	97	217		72.4	42.7	38	140	81	11	3	8	6.3	1			10.4	7.2	2.1	0.7	0.4	0.05	5.07	137	316
Patient 49	Male	0	58	1	0	0	0	Rectum	0	1	3	3	1	1	SD			6.1	4.1	1.1	0.8	0.1	0.02	4.05	129	82		69.5	40.3	21	80	54	7.8	2.6	5.2	6.3	2			9.8	7.2	1.6	0.8	0.1	0.02	4.46	140	76
Patient 50	Male	0	58	1	0	0	0	Rectum	0	1	2	3	1	1	SD			8.4	5.8	2	0.5	0	0.03	5.12	153	175		73.8	43.3	28	108	198	12.6	3.4	9.2	7.2	1			8.4	5.7	2	0.6	0.1	0.04	4.8	142	175
Patient 51	Male	0	58	1	0	0	0	Sigmoid Colon	1	1	1	4	2	1	SD			5.5	4.3	0.8	0.3	0.1	0.02	4.18	128	120		75.5	41.9	18	173	67	9.3	3.2	6.1	4.5	1			7.2	4.8	1.4	0.3	0.6	0.02	4.22	131	107
Patient 52	Male	0	57	1	0	0	0	Rectum	0	1	3	4	2	1	SD			5.6	3.7	1.2	0.5	0.1	0.03	3.94	143	188		78.9	46.8	39	16	98	16.2	4.5	11.7	9.3	1			5.1	3.8	0.8	0.3	0.1	0.03	3.78	122	208
Patient 53	Male	0	57	1	0	0	0	Rectum	0	1	2	3	1	1	SD			6.6	4.9	1	0.5	0.2	0.02	3.76	128	117		75.5	36.6	54	65	135	24.3	8.5	15.8	34.6	1			7	5.3	1	0.5	0.2	0.04	5	145	153
Patient 54	Female	1	57	1	0	0	0	Rectum	0	1	1	3	1	0	SD			3.9	2.3	1.2	0.4	0	0.01	3.66	132	132		62.7	41.6	39	121	222	16.1	4.3	11.8	2.4	1			6	3.9	1.5	0.5	0.1	0.02	4.2	150	164
Patient 55	Female	1	57	1	0	0	0	Colon	1	2	3	3	1	0	PD			4.8	2.5	1.3	0.9	0.1	0.01	2.91	90	170		67.5	31.8	77	30	63	4.5	1.2	3.3	5.2	4			5.4	2.9	1.9	0.5	0	0.02	3.42	97	197
Patient 56	Male	0	57	1	0	0	0	Rectum	0	1	2	4	2	1	PD			7	5	1.1	0.7	0.2	0.02	4.75	144	183		66	28.9	21	216	35	27.2	15.7	11.5	54.8	1			4.3	2.2	1.5	0.3	0.1	0.09	5.64	175	72
Patient 57	Male	0	57	1	1	0	0	Colon	1	2	1	3	1	1	SD			3.8	1.8	0.7	1.3	0	0.01	3.62	107	191		60.1	30.1	27	680	75	30.3	14	16.3	12.1	1			7.5	5.6	0.8	1	0	0.01	3.82	110	126
Patient 58	Female	1	57	1	0	0	0	Rectum	0	1	3	3	1	0	SD			3.6	2.3	0.9	0.3	0	0.02	3.8	102	319		59.3	32	26	24	75	8	2.1	5.9	2.6	1			3.8	2.3	1.1	0.4	0	0.02	4.19	115	173
Patient 59	Female	1	56	1	0	0	0	Colon	1	1	1	3	1	1	SD			11.2	8.8	1.2	1	0.1	0.02	4.78	133	185		67.2	42.5	24	26	86	14.9	2.9	12	6	1			5.4	3.3	1.5	0.4	0.2	0.02	5.33	155	175
Patient 60	Male	0	56	1	1	0	0	Colon	1	2	2	3	1	0	SD			6.6	3.5	2.5	0.5	0.1	0.01	3.76	125	263		85.3	40.7	61	242	121	13.8	4.5	9.3	2.5	1			6.1	3.7	1.9	0.3	0.2	0.02	4.74	145	292
Patient 61	Female	1	56	1	1	0	0	Rectum	0	1	3	2		0	PD			6.1	4.9	0.7	0.3	0.1	0.03	4.79	154	145		82.1	46.4	24	29	107	11.9	3.6	8.3	1.9	2			5.1	3.8	0.8	0.2	0.3	0.02	4.6	148	120
Patient 62	Female	1	56	1	0	0	0	Rectum	0	1	3	3	1	0	SD			8.9	4.2	2.8	0.7	1.1	0.06	3.64	112	384		82.1	48.4	105	562	99	7.5	2.8	4.7	4.3	1			10.4	6.9	2.2	0.8	0.5	0.06	4.18	121	416
Patient 63	Female	1	56	1	1	0	0	Rectum	0	1	3	3	1	0	PD			4.1	3.4	0.3	0.4	0	0.01	3.56	107	162		61.9	32.1	21	29	16	5.7	1.3	4.4	3.5	4			4.3	3.7	0.2	0.3	0	0.02	3.38	103	78
Patient 64	Male	0	56	1	0	1	0	Rectum	0	1	2	1		1	SD			3.9	2.8	0.7	0.3	0.1	0.01	4.6	135	240		49.2	31.7	13	31	60	12.4	2.5	9.9	6.3	1			5.3	3.9	1.1	0.3	0	0.02	5.14	152	231
Patient 65	Male	0	55	1	1	0	0	Colon	1	2	2	3	1	1	SD			5.4	3.1	1.6	0.6	0.1	0.02	4.15	137	161		65.6	39.1	21	96	107	5.3	0.2	5.1	7.8	1			5.7	3.4	1.4	0.6	0.2	0.02	4.3	141	169
Patient 66	Female	1	55	1	0	0	0	Rectum	0	1	2	4	2	1	SD			4.9	3.4	0.7	0.4	0.3	0.01	2.87	86	89		54	32.8	11	19	43	9.6	3.4	6.2	26.4	4			6.5	5.1	0.7	0.5	0.2	0.01	2.69	70	216
Patient 67	Male	0	55	1	0	0	0	Rectum	0	1	3	3	1	0	PD			9	5.8	2	0.8	0.4	0.04	3.82	129	72		78.4	37.6	47	205	114	18.4	8	10.4	54.3	1			6.4	4.2	1.4	0.4	0.4	0.01	3.88	126	62
Patient 68	Female	1	55	1	0	0	0	Rectum	0	1	3	4	2	0	PD			3.2	2	0.8	0.3	0	0.01	3.51	101	169		77.9	33.1	34	22	44	4	1.6	2.4	10.1	2			4.9	3.8	0.8	0.3	0	0	3.67	104	130
Patient 69	Female	1	55	1	1	0	0	Wild-type	0	1	2	3	1	0	SD			4.6	3.4	0.7	0.3	0.1	0.01	3.99	117	103		69.4	42.1	64	30	88	11.1	3.1	8	8.8	1			6.8	5.7	0.7	0.3	0.1	0.01	3.52	106	107
Patient 70	Male	0	55	1	0	0	0	Colon	1	2	1	3	1	1	SD			7.6	5.2	1.7	0.3	0.3	0.03	4.55	139	147		68	42.2	52	182	97	11.5	3.3	8.2	13.4	1			9.2	7.2	1.2	0.4	0.4	0.03	4.67	140	227
Patient 71	Female	1	55	1	1	0	0	Sigmoid Colon	1	1	3	3	1	0	SD			7.7	5.6	1.6	0.5	0	0.02	4.84	129	198		81.7	41.7	28	34	71	8.7	3.4	5.3	4.4	1			8.4	5.9	1.8	0.7	0	0.03	4.97	134	230
Patient 72	Male	0	55	1	1	0	0	Rectum	0	1	3	3	1	0	SD			6.7	4	1.6	0.7	0.4	0.05	4.16	127	334		69.3	40.3	25	207	125	9.7	4.3	5.4	9.7	2			10.8	8.7	0.9	0.7	0.5	0.04	3.45	99	291
Patient 73	Male	0	55	1	1	0	0	Colon	1	2	3	3	1	0	PD			10.7	8	1	0.3	1.4	0.04	4.18	129	154		68.8	36.4	51	100	111	13.3	5.7	7.6	17.7	1			4.9	2.5	1.6	0.4	0.3	0.02	4.33	127	148
Patient 74	Male	0	55	1	1	0	0	Rectum	0	1	2	3	1	0	SD			4.2	2.3	1.5	0.3	0	0.01	3.69	120	155		76.9	46.2	32	227	223	13.8	4.4	9.4	16.2	1			4.4	2.5	1.6	0.3	0	0.02	4.35	143	120
Patient 75	Female	1	55	1	1	0	0	Rectum	0	1	3	3	1	0	PD			5.6	3.4	1.8	0.3	0.1	0.02	2.9	101	210		71.8	39.9	19	25	74	6.7	2.2	4.5	1.9	1			5.8	4.3	1.3	0.2	0.1	0.02	2.79	90	98
Patient 76	Male	0	55	1	1	0	0	Rectum	0	1	3	3	1	1	PD			5.7	3.5	1.4	0.6	0.3	0.02	3.86	124	128		70.2	41.3	50	418	64	6.7	1.2	5.5	16.1	1			5.9	3.3	1.6	0.6	0.4	0.04	4.29	134	145
Patient 77	Male	0	54	1	0	0	0	Rectum	0	1	1	3	1	1	SD			5.6	3.8	1.2	0.3	0.3	0.02	5.03	162	116		76.8	40.7	38	66	183	18.5	5.4	13.1	2.8	1			6.8	3.8	1.7	0.5	0.8	0.03	5.62	165	140
Patient 78	Female	1	54	1	1	0	0	Rectum	0	1	3	3	1	0	SD			3.7	2.3	1.1	0.2	0.1	0.02	3.83	121	194		67	37.8	37	130	64	7.4	2	5.4	6.5	1			5	3.6	1	0.3	0.1	0.03	4.1	125	219
Patient 79	Male	0	54	1	0	1	0	Colon	1	1	3	3	1	0	SD			4.4	3.3	0.5	0.6	0	0.02	3.3	96	252		65.6	38.3	50	108	440	10.2	2.8	7.4	2.2	1			2.6	2.3	0.3	0	0	0	3.33	92	160
Patient 80	Male	0	53	1	1	0	0	Rectum	0	1	2	3	1	0	SD			3.9	2.8	0.6	0.5	0.1	0.01	3.72	112	199		61.9	41.5	38	110	114	9.9	2.3	7.6	2.1	1			6.1	4.9	0.7	0.4	0	0.01	4.05	124	182
Patient 81	Female	1	53	1	0	0	0	Colon	1	1	3	3	1	0	PD			6.3	4.4	1.6	0.3	0.1	0.01	4.39	136	153		73.1	45.6	29	180	64	15	4.6	10.4	3	4			4.9	2.6	2.1	0.2	0.1	0.01	4.34	137	121
Patient 82	Male	0	53	1	1	0	0	Colon	1	2	3	3	1	1	SD			4.5	2.3	1.4	0.6	0.2	0.03	4.13	141	150		68.1	39.5	50	160	60	7	1.9	5.1	8.6	1			4.3	3.9	0.1	0.2	0	0	4.68	155	31
Patient 83	Male	0	52	1	1	0	0	Rectum	0	1	3	4	2	0	SD			4.3	2.7	0.9	0.5	0.2	0.02	4.05	125	77		70.3	39	38	143	145	20.6	7.5	13.1	33.2	1			6.7	4.9	1.1	0.3	0.4	0.03	3.96	11.4	185
Patient 84	Female	1	52	1	1	0	0	Colon	1	1	2	3	1	0	SD			3.5	2.4	0.9	0.2	0	0.04	3.71	121	155		82.1	45.4	72	101	52	10.9	3.6	7.3	5.6	3			5.4	3.7	1.1	0.3	0.2	0.09	4.02	126	107
Patient 85	Male	0	52	1	1	0	0	Colon	1	1	3	4	2	0	SD			3.7	3	0.5	0.2	0.1	0.01	2.88	88	120		64.8	31.5	19	21	61	9.1	3.9	5.2	11	1			3.9	2.9	0.5	0.4	0	0.01	3.06	93	123
Patient 86	Male	0	51	1	0	0	0	Colon	1	2	2	4	2	0	SD			5.3	3.5	1.3	0.5	0	0	3.78	103	328		78.7	39.5	15	25	48	5.5	2	3.5	8.4	4			4.9	3.5	0.9	0.3	0.2	0.01	3.06	84	251
Patient 87	Male	0	51	1	0	0	0	Colon	1	2	3	3	1	1	SD			4.2	2.5	1.1	0.4	0.2	0.03	3.02	99	130		70.6	37.3	20	86	35	16.4	6.7	9.7	14.5	1			5.5	4.2	0.9	0.4	0	0.02	3.04	96	65
Patient 88	Male	0	51	1	0	0	0	Rectum	0	1	3	3	1	1	PD			8.7	6.5	0.5	1.5	0.1	0.07	4.7	132	286		46.8	24.3	25	270	21	3.7	1.8	1.9	12.4	2			9.4	7.5	0.5	0.7	0.7	0.04	5.08	145	291
Patient 89	Male	0	50	1	0	0	0	Colon	1	1	3	3	1	1	SD			4.9	2.5	1.9	0.4	0.1	0.01	3.96	143	133		68.2	45.7	30	25	194	10.4	3	7.4	10.2	1			6.9	3.4	3	0.4	0.1	0.03	5.03	157	133
Patient 90	Male	0	50	1	1	1	0	Rectum	0	1	2	3	1	0	SD			6.5	3.8	2.1	0.4	0.1	0.03	3.89	122	159		86.1	38.1	46	157	100	11.6	6.2	5.4	11	4			5.8	3.9	1.5	0.3	0.1	0.01	3.4	110	183
Patient 91	Female	1	50	1	1	0	0	Rectum	0	1	3	3	1	0	PD			4.2	2.2	1.5	0.3	0.1	0.02	4.22	121	273		70.7	46.1	29	28	83	5.4	1.6	3.8	7	1			5.6	3.3	1.4	0.4	0.5	0.04	3.91	112	245
Patient 92	Female	1	49	1	1	1	0	Colon	1	1	2	4	2	1	SD			6.3	4.9	1	0.4	0	0.01	3.71	114	463		70.4	35.9	32	156	71	7.2	2.1	5.1	19.7	1			4.3	2.7	1.2	0.3	0	0.01	3.06	88	652
Patient 93	Male	0	49	1	0	0	0	Colon	1	1	2	3	1	0	SD			6.1	4.1	1.3	0.6	0	0.01	4.34	153	193		71.5	43.1	39	97	139	14.8	5	9.8	2.3	1			9.6	8	0.9	0.6	0.1	0.02	4.61	144	167
Patient 94	Male	0	49	1	0	0	0	Colon	1	2	1	3	1	0	SD			5.3	2.5	2.2	0.4	0.1	0.03	4.55	143	199		68	43.3	53	297	106	7.3	2.8	4.5	104.8	3			7.5	4.4	2.3	0.5	0.2	0.05	4.3	135	200
Patient 95	Male	0	47	1	0	0	0	Sigmoid Colon	1	1	2	3	1	1	PD			6	4.6	0.9	0.4	0	0.04	3.97	113	334		76.8	35.4	27	120	66	6	2.3	3.7	4.5	2			8.3	6.5	1	0.7	0.1	0.05	4.02	103	310
Patient 96	Male	0	46	1	0	0	0	Rectum	0	1	2	3	1	0	SD			4.8	3.2	1	0.4	0.1	0.02	4.22	11.7	222		75.9	47.9	24	25	63	5.1	1.3	3.8	7.3	3			5	3.2	1.2	0.4	0.1	0.03	5.03	124	190
Patient 97	Female	1	46	1	1	0	0	Rectum	0	1	3	3	1	1	SD			6.3	4.6	1.1	0.5	0	0.01	4.33	94	242		70.2	43.1	15	44	35	9.9	2.9	7	3.7	1			9.8	7.7	1.1	0.7	0.2	0.01	4.51	102	129
Patient 98	Male	0	45	1	0	0	0	Colon	1	2	3	3	1	0	PD			5.2	4.3	0.6	0.3	0	0.03	4.71	141	70		73.4	47.1	62	402	89	13.4	4.5	8.9	9.1	1			5.2	4.3	0.6	0.3	0	0.03	4.71	141	70
Patient 99	Male	0	45	1	0	0	0	Rectum	0	1	1	1		1	SD			10.4	8	1.4	0.7	0.3	0.02	5.01	139	140		75	39.6	44	189	70	16.8	5.7	11.1	4.1	1			11.2	9.3	1.3	0.6	0	0	5.1	147	149
Patient 100	Male	0	42	1	0	0	0	Colon	1	1	1	4	2	0	SD			14.8	11.5	1.8	1.3	0.1	0.04	4.16	110	261		67.3	35.3	26	81	136	9.1	2.7	6.4	8.6	1			10.4	5.8	3.5	0.8	0.2	0.08	4.33	108	351
Patient 101	Male	0	39	1	0	0	0	Colon	1	2	2	4	2	1	SD			6.4	2.9	2	0.6	0.8	0.06	4.52	142	238		65.6	40.7	21	24	170	6.3	2.3	4	4.6	3			6.6	3.8	1.8	0.5	0.5	0.05	5.32	161	297
Patient 102	Female	1	38	1	0	0	1	Rectum	0	1	2	4	2	1	SD			6.6	5.3	0.8	0.5	0	0.01	4.75	135	240		68.6	40.9	33	25	28	11.8	4.3	7.5	5.1	4			10	8.1	0.9	1	0	0.04	4.22	116	256
Patient 103	Female	1	36	1	1	0	0	Colon	1	1	3	3	1	0	PD			6.9	5.1	1.6	0.3	0	0.01	3.71	106	132		58.5	37.4	12	12	37	9.4	2.7	6.7	2.2	4			6.9	5.1	1.6	0.3	0	0.01	3.71	106	132
Patient 104	Female	1	32	1	1	0	0	Rectum	0	1	3	4	2	0	PD			3.7	2	1.1	0.3	0.2	0.02	3.94	111	182		49.3	33.2	11	46	34	6.2	1.6	4.6	6.2	4			4.9	3	1.4	0.4	0	0.01	3.87	115	161
Patient 105	Female	1	31	1	0	0	0	Colon	1	1	3	4	2	1	SD			3.3	1.1	1.4	0.4	0.3	0.03	3.76	135	189		67.9	36.9	39	104	74	12.5	3.6	8.9	3.1	1			4.7	2.5	1.5	0.4	0.3	0.04	4.11	130	281
Patient 106	Female	1	28	1	1	0	0	Rectum	0	1	2	3	1	0	PD			6.4	4.9	0.6	0.6	0.2	0.02	2.91	75	293		62.7	35.4	51	168	112	7.5	3.4	4.1	7.4	3			5.3	4.1	0.6	0.4	0.2	0.03	4.02	96	296
[truncated: 15 more columns]
