# Supplementary material for: Effect of prognostic nutritional index on laboratory parameters and survival in metastatic colorectal cancer patients treated with fruquintinib: a retrospective study
Source: PeerJ. 2024 Nov 29;12:e18565. doi: 10.7717/peerj.18565 (PMC11610478; doi:10.7717/peerj.18565)
Supplement: Supplemental Information 2 [file peerj-12-18565-s002.xlsx]

## Sheet: table 4-7 information
Name	Gender	Male=0 Female=1	Age	≥65=0 ＜65=1	KRAS Mutation=1 Wild-type=0	NRAS Mutation=1 Wild-type=0	Total RAS: Mutation = 0, Wild-type or Unknown = 1	BRAF: Mutation = 0, Wild-type or Unknown = 1	Primary Site	Colon = 1, Rectum = 2	Left Half=1 Right Half=2	Metastatic Sites (Three or More=3)	One site = 1, Two or more sites = 2	Line of Drug Therapy	Third line or below = 1, Fourth line or above = 2	PD-1: Combined = 1, Not Combined = 2	Response	PD=1 PR+SD=2	Death Status	Alive = 0, Dead = 1	OS(day)	PFS(day)	Post-treatment PNI=45.8	≥cutoff=1 ≤2
Patient 1	Male	0	78	0	1	0	0	1	Rectum	2	1	3	2	3	1	1	SD	2	Yes	1	355	72	49.4	1
Patient 2	Male	0	77	0	0	0	1	1	Rectum	2	1	1	1	4	2	2	SD	2	Yes	1	712	168	44.3	2
Patient 3	Male	0	76	0	0	0	1	1	Colon	1	1	3	2	3	1	2	SD	2	Yes	1	321	112	44.1	2
Patient 4	Male	0	74	0	0	0	1	1	Rectum	2	1	3	2	3	1	2	SD	2	Yes	1	496	56	45.4	2
Patient 5	Female	1	73	0	0	0	1	1	Colon	1	2	3	2	3	1	2	PD	1	No	0	508	28	44.1	2
Patient 6	Male	0	73	0	1	0	0	1	Colon	1	2	2	2	4	2	2	PD	1	Yes	1	208	28	46.4	1
Patient 7	Male	0	73	0	0	0	1	1	Rectum	2	1	2	2	3	1	1	PD	1	No	0	564	56	37.2	2
Patient 8	Male	0	72	0	0	0	1	1	Rectum	2	1	2	2	3	1	1	SD	2	No	0	621	72	48.8	1
Patient 9	Male	0	72	0	0	0	1	1	Colon	1	2	3	2	3	1	2	SD	2	Yes	1	384	224	45.1	2
Patient 10	Male	0	72	0	1	0	0	1	Rectum	2	1	2	2	3	1	2	PD	1	Yes	1	108	56	34.9	2
Patient 11	Male	0	71	0	0	0	1	1	Colon	1	2	2	2	3	1	1	SD	2	Yes	1	257	72	41.4	2
Patient 12	Male	0	71	0	0	0	1	1	Rectum	2	1	3	2	3	1	1	SD	2	Yes	1	513	252	41.5	2
Patient 13	Male	0	70	0	0	0	1	1	Rectum	2	1	2	2	3	1	2	SD	2	Yes	1	170	112	40.2	2
Patient 14	Male	0	70	0	0	0	1	1	Colon	1	1	3	2	3	1	2	SD	2	Yes	1	439	72	37	2
Patient 15	Male	0	70	0	1	0	0	1	Rectum	2	1	2	2	3	1	2	PD	1	Yes	1	174	28	45.4	2
Patient 16	Male	0	69	0	0	0	1	1	Rectum	2	1	1	1	4	2	1	SD	2	Yes	1	402	72	44.4	2
Patient 17	Male	0	67	0	1	0	0	1	Colon	1	1	2	2	3	1	2	SD	2	Yes	1	659	56	33.3	2
Patient 18	Female	1	67	0	1	0	0	1	Colon	1	2	3	2	4	2	2	SD	2	Yes	1	801	168	44.5	2
Patient 19	Male	0	67	0	0	0	1	1	Rectum	2	1	2	2	3	1	2	SD	2	No	0	233	112	50.4	1
Patient 20	Female	1	67	0	0	0	1	1	Rectum	2	1	2	2	3	1	1	SD	2	Yes	1	454	112	48.3	1
Patient 21	Male	0	66	0	0	0	1	1	Rectum	2	1	2	2	3	1	2	SD	2	Yes	1	230	112	45.4	2
Patient 22	Female	1	66	0	0	0	1	1	Rectum	2	1	3	2	3	1	1	SD	2	Yes	1	92	56	45.7	2
Patient 23	Male	0	66	0	1	0	0	1	Colon	1	2	2	2	3	1	2	PD	1	Yes	1	64	28	35.4	2
Patient 24	Female	1	65	0	1	0	0	1	Rectum	2	1	3	2	3	1	2	SD	2	No	0	627	56	40.5	2
Patient 25	Male	0	65	0	0	0	1	1	Rectum	2	1	3	2	3	1	2	SD	2	No	0	735	56	47.3	1
Patient 26	Female	1	65	0	0	0	1	1	Colon	1	2	3	2	3	1	2	PD	1	Yes	1	51	28	42.8	2
Patient 27	Male	0	65	0	0	0	1	1	Rectum	2	1	2	2	3	1	2	PD	1	Yes	1	246	56	36.7	2
Patient 28	Female	1	65	0	1	0	0	1	Colon	1	1	3	2	3	1	2	PD	1	Yes	1	192	56	48.4	1
Patient 29	Male	0	64	1	0	0	1	1	Colon	1	2	3	2	4	2	2	SD	2	Yes	1	249	112	43	2
Patient 30	Male	0	64	1	0	0	1	1	Rectum	2	1	2	2	3	1	2	SD	2	No	0	645	448	43	2
Patient 31	Male	0	64	1	0	0	1	1	Rectum	2	1	2	2	3	1	1	SD	2	Yes	1	132	56	49.1	1
Patient 32	Female	1	64	1	0	0	1	1	Colon	1	1	2	2	2	1	2	PD	1	No	0	537	28	50	1
Patient 33	Female	1	63	1	0	0	1	1	Colon	1	2	2	2	3	1	2	PD	1	Yes	1	244	28	53.8	1
Patient 34	Female	1	62	1	1	0	0	1	Rectum	2	1	2	2	3	1	1	SD	2	Yes	1	179	72	43.5	2
Patient 35	Female	1	62	1	0	0	1	1	Colon	1	1	2	2	4	2	1	PD	1	Yes	1	121	56	39.3	2
Patient 36	Female	1	62	1	0	0	1	1	Colon	1	2	2	2	3	1	1	SD	2	Yes	1	68	56	32.9	2
Patient 37	Male	0	60	1	0	0	1	1	Rectum	2	1	2	2	5	2	2	PD	1	Yes	1	124	28	41.2	2
Patient 38	Male	0	60	1	0	0	1	0	Colon	1	2	3	2	3	1	2	PD	1	Yes	1	48	28	42.1	2
Patient 39	Male	0	60	1	0	0	1	1	Colon	1	1	2	2	3	1	2	SD	2	Yes	1	542	28	46.6	1
Patient 40	Male	0	60	1	0	0	1	1	Rectum	2	1	3	2	3	1	1	SD	2	No	0	537	56	32.5	2
Patient 41	Female	1	60	1	1	0	0	1	Colon	1	2	3	2	4	2	1	SD	2	No	0	613	56	48.8	1
Patient 42	Male	0	60	1	0	0	1	1	Colon	1	1	2	2	4	2	1	SD	2	No	0	543	72	44.5	2
Patient 43	Male	0	59	1	0	0	1	1	Colon	1	1	2	2	3	1	1	PR	2	No	0	648	252	45.9	1
Patient 44	Male	0	59	1	0	1	0	1	Rectum	2	1	2	2	3	1	2	SD	2	Yes	1	789	196	44.9	2
Patient 45	Male	0	59	1	0	0	1	1	Rectum	2	1	3	2	5	2	1	SD	2	Yes	1	179	112	37.2	2
Patient 46	Male	0	59	1	1	0	0	1	Rectum	2	1	3	2	3	1	1	SD	2	Yes	1	260	112	47	1
Patient 47	Male	0	59	1	0	0	1	1	Colon	1	1	3	2	3	1	1	SD	2	Yes	1	708	308	52.8	1
Patient 48	Male	0	58	1	1	1	0	1	Rectum	2	1	3	2	3	1	2	PD	1	Yes	1	80	56	50.5	1
Patient 49	Male	0	58	1	0	0	1	1	Rectum	2	1	3	2	3	1	1	SD	2	Yes	1	134	72	43.4	2
Patient 50	Male	0	58	1	0	0	1	1	Rectum	2	1	2	2	3	1	1	SD	2	No	0	608	72	48.3	1
Patient 51	Male	0	58	1	0	0	1	1	Sigmoid Colon	1	1	1	1	4	2	1	SD	2	No	0	355	112	41.6	2
Patient 52	Male	0	57	1	0	0	1	1	Rectum	2	1	3	2	4	2	1	SD	2	Yes	1	165	72	40.3	2
Patient 53	Male	0	57	1	0	0	1	1	Rectum	2	1	2	2	3	1	1	SD	2	Yes	1	166	72	42.1	2
Patient 54	Female	1	57	1	0	0	1	1	Rectum	2	1	1	1	3	1	2	SD	2	Yes	1	321	112	48.5	1
Patient 55	Female	1	57	1	0	0	1	1	Colon	1	2	3	2	3	1	2	PD	1	Yes	1	99	28	38.4	2
Patient 56	Male	0	57	1	0	0	1	1	Rectum	2	1	2	2	4	2	1	PD	1	Yes	1	68	28	42.6	2
Patient 57	Male	0	57	1	1	0	0	1	Colon	1	2	1	1	3	1	1	SD	2	Yes	1	95	72	34.4	2
Patient 58	Female	1	57	1	0	0	1	1	Rectum	2	1	3	2	3	1	2	SD	2	Yes	1	128	56	38	2
Patient 59	Female	1	56	1	0	0	1	1	Colon	1	1	1	1	3	1	1	SD	2	No	0	956	280	47.3	1
Patient 60	Male	0	56	1	1	0	0	1	Colon	1	2	2	2	3	1	2	SD	2	Yes	1	157	72	43.7	2
Patient 61	Female	1	56	1	1	0	0	1	Rectum	2	1	3	2	2	1	2	PD	1	Yes	1	319	56	46.5	1
Patient 62	Female	1	56	1	0	0	1	1	Rectum	2	1	3	2	3	1	2	SD	2	Yes	1	261	112	49.8	1
Patient 63	Female	1	56	1	1	0	0	1	Rectum	2	1	3	2	3	1	2	PD	1	Yes	1	64	28	37.1	2
Patient 64	Male	0	56	1	0	1	0	1	Rectum	2	1	2	2	1	1	1	SD	2	No	0	984	469	44.3	2
Patient 65	Male	0	55	1	1	0	0	1	Colon	1	2	2	2	3	1	1	SD	2	Yes	1	523	56	41.4	2
Patient 66	Female	1	55	1	0	0	1	1	Rectum	2	1	2	2	4	2	1	SD	2	Yes	1	325	168	36.1	2
Patient 67	Male	0	55	1	0	0	1	1	Rectum	2	1	3	2	3	1	2	PD	1	Yes	1	216	28	45.5	2
Patient 68	Female	1	55	1	0	0	1	1	Rectum	2	1	3	2	4	2	2	PD	1	Yes	1	245	56	44.1	2
Patient 69	Female	1	55	1	1	0	0	1	Wild-type	2	1	2	2	3	1	2	SD	2	Yes	1	383	112	41.2	2
Patient 70	Male	0	55	1	0	0	1	1	Colon	1	2	1	1	3	1	1	SD	2	Yes	1	242	72	45.3	2
Patient 71	Female	1	55	1	1	0	0	1	Sigmoid Colon	1	1	3	2	3	1	2	SD	2	Yes	1	125	28	45.1	2
Patient 72	Male	0	55	1	1	0	0	1	Rectum	2	1	3	2	3	1	2	SD	2	Yes	1	112	72	32.9	2
Patient 73	Male	0	55	1	1	0	0	1	Colon	1	2	3	2	3	1	2	PD	1	Yes	1	129	56	41.9	2
Patient 74	Male	0	55	1	1	0	0	1	Rectum	2	1	2	2	3	1	2	SD	2	Yes	1	243	28	52.6	1
Patient 75	Female	1	55	1	1	0	0	1	Rectum	2	1	3	2	3	1	2	PD	1	Yes	1	124	28	35.3	2
Patient 76	Male	0	55	1	1	0	0	1	Rectum	2	1	3	2	3	1	1	PD	1	Yes	1	198	56	41.9	2
Patient 77	Male	0	54	1	0	0	1	1	Rectum	2	1	1	1	3	1	1	SD	2	Yes	1	468	138	53	1
Patient 78	Female	1	54	1	1	0	0	1	Rectum	2	1	3	2	3	1	2	SD	2	Yes	1	255	72	39.3	2
Patient 79	Male	0	54	1	0	1	0	1	Colon	1	1	3	2	3	1	2	SD	2	Yes	1	35	28	25.4	2
Patient 80	Male	0	53	1	1	0	0	1	Rectum	2	1	2	2	3	1	2	SD	2	Yes	1	344	28	46.5	1
Patient 81	Female	1	53	1	0	0	1	1	Colon	1	1	3	2	3	1	2	PD	1	Yes	1	635	56	56.8	1
Patient 82	Male	0	53	1	1	0	0	1	Colon	1	2	3	2	3	1	1	SD	2	Yes	1	61	28	32.1	2
Patient 83	Male	0	52	1	1	0	0	1	Rectum	2	1	3	2	4	2	2	SD	2	Yes	1	174	112	43.7	2
Patient 84	Female	1	52	1	1	0	0	1	Colon	1	1	2	2	3	1	2	SD	2	Yes	1	626	56	48.2	1
Patient 85	Male	0	52	1	1	0	0	1	Colon	1	1	3	2	4	2	2	SD	2	Yes	1	439	28	37.6	2
Patient 86	Male	0	51	1	0	0	1	1	Colon	1	2	2	2	4	2	2	SD	2	Yes	1	622	196	27.5	2
Patient 87	Male	0	51	1	0	0	1	1	Colon	1	2	3	2	3	1	1	SD	2	Yes	1	315	72	34.4	2
Patient 88	Male	0	51	1	0	0	1	1	Rectum	2	1	3	2	3	1	1	PD	1	Yes	1	123	28	28.7	2
Patient 89	Male	0	50	1	0	0	1	1	Colon	1	1	3	2	3	1	1	SD	2	No	0	951	196	55.5	1
Patient 90	Male	0	50	1	1	1	0	1	Rectum	2	1	2	2	3	1	2	SD	2	Yes	1	128	56	47.6	1
Patient 91	Female	1	50	1	1	0	0	1	Rectum	2	1	3	2	3	1	2	PD	1	Yes	1	427	28	45.3	2
Patient 92	Female	1	49	1	1	1	0	1	Colon	1	1	2	2	4	2	1	SD	2	Yes	1	147	61	33.4	2
Patient 93	Male	0	49	1	0	0	1	1	Colon	1	1	2	2	3	1	2	SD	2	Yes	1	167	56	39.2	2
Patient 94	Male	0	49	1	0	0	1	1	Colon	1	2	1	1	3	1	2	SD	2	Yes	1	358	72	53.5	1
Patient 95	Male	0	47	1	0	0	1	1	Sigmoid Colon	1	1	2	2	3	1	1	PD	1	Yes	1	214	28	36.4	2
Patient 96	Male	0	46	1	0	0	1	1	Rectum	2	1	2	2	3	1	2	SD	2	Yes	1	1118	72	48.2	1
Patient 97	Female	1	46	1	1	0	0	1	Rectum	2	1	3	2	3	1	1	SD	2	Yes	1	73	72	39.9	2
Patient 98	Male	0	45	1	0	0	1	1	Colon	1	2	3	2	3	1	2	PD	1	No	0	924	28	50.1	1
Patient 99	Male	0	45	1	0	0	1	1	Rectum	2	1	1	1	1	1	1	SD	2	No	0	690	336	46.7	1
Patient 100	Male	0	42	1	0	0	1	1	Colon	1	1	1	1	4	2	2	SD	2	Yes	1	133	56	54.4	1
Patient 101	Male	0	39	1	0	0	1	1	Colon	1	2	2	2	4	2	1	SD	2	Yes	1	467	112	55.1	1
Patient 102	Female	1	38	1	0	0	1	0	Rectum	2	1	2	2	4	2	1	SD	2	Yes	1	90	28	36.1	2
Patient 103	Female	1	36	1	1	0	0	1	Colon	1	1	3	2	3	1	2	PD	1	Yes	1	182	28	40	2
Patient 104	Female	1	32	1	1	0	0	1	Rectum	2	1	3	2	4	2	2	PD	1	Yes	1	23	56	47.7	1
Patient 105	Female	1	31	1	0	0	1	1	Colon	1	1	3	2	4	2	1	SD	2	No	0	753	56	47.5	1
Patient 106	Female	1	28	1	1	0	0	1	Rectum	2	1	2	2	3	1	2	PD	1	Yes	1	149	28	35	2
